# Supplementary material
Source: PubMed Central journal article supplement (PMC4094618)
Supplement: gmb-73-2-310-fs1.pdf [file gmb-73-2-310-fs1.pdf]

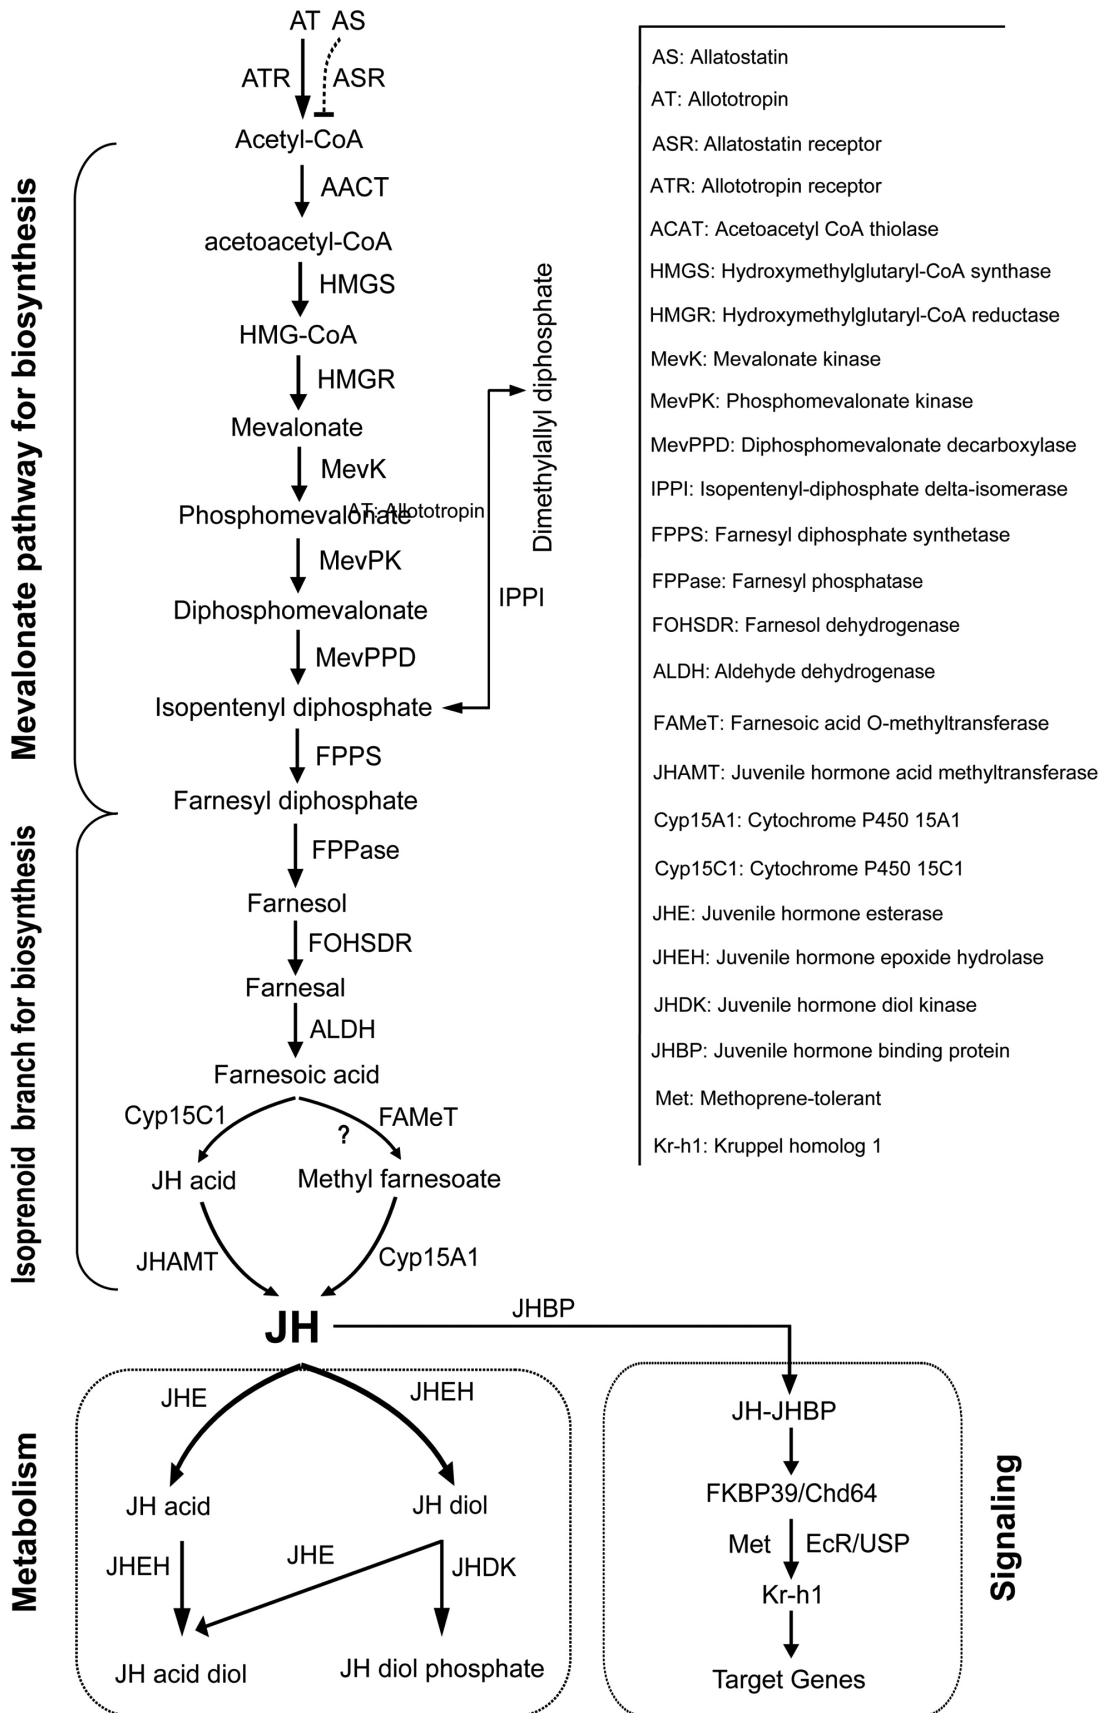

**Figure S1** - Summary of insect JH-related pathways. Taken into account previous reports, we summarized the main steps in the pathways related to the biosynthesis, metabolism, and signaling of JH in insects.
