# Supplementary material
Source: PubMed Central journal article supplement (PMC4094618)
Supplement: gmb-73-2-310-fs2.pdf [file gmb-73-2-310-fs2.pdf]

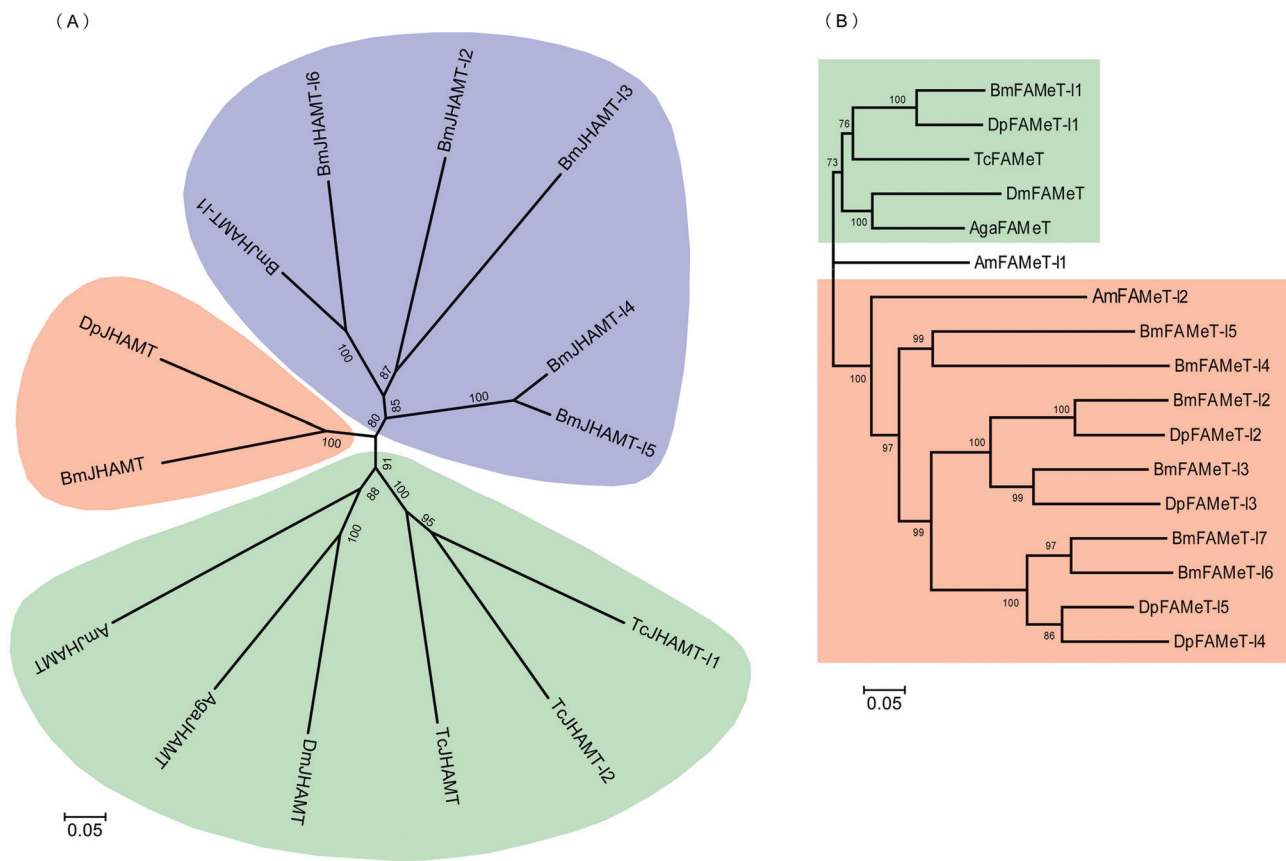

**Figure S2** - Phylogenetic tree of the *JHAMT* and *FAMEt* genes from *B. mori* and other insects. The amino acid sequences encoding by the *JHAMT* or *JHAMT* genes (A) and *FAMEt* genes (B) from six insect species, including *Bombyx mori* (Bm), *Drosophila melanogaster* (Dm), *Anopheles gambiae* (Aga), *Apis mellifera* (Am), *Tribolium castaneum* (Tc), and *Danaus plexippus* (Dp), were used to build a phylogenetic tree. See Figure 2 for a detailed description of the approaches for constructing the phylogenetic tree.
