# Supplementary material
Source: PubMed Central journal article supplement (PMC4094618)
Supplement: gmb-73-2-310-ts1.pdf [file gmb-73-2-310-ts1.pdf]

**Table S1 RT-PCR Primers used in this study**

| <b>Gene</b>     | <b>Forward</b>                     | <b>Reverse</b>                   |
|-----------------|------------------------------------|----------------------------------|
| <i>RpL3</i>     | 5' TCGTCATCGTGGTAAGGTCAA 3'        | 5' TTTGTATCCTTTGCCCTTGGT 3'      |
| <b>FPPS1</b>    | 5' CAATGGAGAAATACGAAGCGAT 3'       | 5' TCCCCGAAGCAGTCCAGAA 3'        |
| <b>FPPS2</b>    | 5' CATAGACTGCTTCGGTGATGAAATAAAA 3' | 5' TTCACTGCTACCATAACAGGCTTTGA 3' |
| <b>FPPS3</b>    | 5' CGGTTGTTCTAGGCTTGATCC 3'        | 5' CGGTCCCTTTTTTCCCTGTAA 3'      |
| <b>JHAMT</b>    | 5' TGGCTGCGACATAAGCGAAGA 3'        | 5' CCTGTTCAGGTCTGCGGTCAA 3'      |
| <b>JHAMT-11</b> | 5' CCTTTTCCAACATTTGCCCA 3'         | 5' TGAGGGACCCAATGGAACG 3'        |
| <b>JHAMT-12</b> | 5' ATCACTAGATGCATTCGCTCCA 3'       | 5' TAAGTCCTTTTTTGTCAATTGTCAC 3'  |
| <b>JHAMT-13</b> | 5' AGTAGAAAGATTTTGTGGGCTGC 3'      | 5' GGTTCGGAATCCAATGTAATGTGT 3'   |
| <b>JHAMT-14</b> | 5' TAGGATGTGGCGACGGAAGT 3'         | 5' CAGCTCATCGGGAATATCACCT 3'     |
| <b>JHAMT-15</b> | 5' AGTTTTACCATGAACGATGACGC 3'      | 5' CAGATTTAACGTTACGTCGCA 3'      |
| <b>JHAMT-16</b> | 5' GACTTGATGGCAAAGGACGG 3'         | 5' AAGCCAACCTTCTCCAATAACGA 3'    |
| <b>FAMeT-11</b> | 5' GCCGATGCCACCAATGTCT 3'          | 5' ACTCCGTCCCAGCCTTCA 3'         |
| <b>FAMeT-12</b> | 5' AGAGCGTCATCAGGAAAAATAGA 3'      | 5' AAAGTGGGAAAGGTTTCGGGA 3'      |
| <b>FAMeT-13</b> | 5' TGTGACTATTGGGTTGCCTTG 3'        | 5' ACTCCAGTTTCATAATGGGTTCT 3'    |
| <b>FAMeT-14</b> | 5' AGTCGTCGGTGGTTACTCAGAAG 3'      | 5' AGAGACCACGCCTTACATTTTTTC 3'   |
| <b>FAMeT-15</b> | 5' TGTTCCCGCCAAGTTATTC 3'          | 5' TCGGCTGTGACACCAAAGTT 3'       |
| <b>FAMeT-16</b> | 5' CTCACCCACACGGGTTTCCT 3'         | 5' CGCTTCGGCTTCTTCCAC 3'         |
| <b>FAMeT-17</b> | 5' CCCAGTGATGATGCCGATGT 3'         | 5' TAGTCGTAGCAGGTGGCGGT 3'       |
| <b>JHE</b>      | 5' CCGAGGAAGGTCCAGTTTGC 3'         | 5' AGACCAGGCTTCGTAGGCGT 3'       |
| <b>JHE-11</b>   | 5' GGGAGACCCTAAGCGAGTGAC 3'        | 5' ATTGGGGACGAGCTATAGAAGTTT 3'   |
| <b>JHE-12</b>   | 5' TGAAACCTAAAGGCATGAGTGAAG 3'     | 5' CAGAGGCAAGAGACAAGTATCCAA 3'   |
| <b>JHE-13</b>   | 5' CGTCGGTTGTGGTGTATTCTGC 3'       | 5' CTGGCTCCTGTGGGTGGTTTCC 3'     |
| <b>JHDK</b>     | 5' AGTCAGAAAAAAGAACTGCTCCA 3'      | 5' GATGTCGTAGGTGGGCTTC 3'        |
| <b>JHDK-11</b>  | 5' TTCAGAAAAAAGAAGTTGTTGCT 3'      | 5' TGCTACTTCTAAGGCAGGGCT 3'      |
| <b>JHDK-12</b>  | 5' GCAGCGGAACCATTGATAAAA 3'        | 5' CCCAGACCTTCAAAGCGTGT 3'       |
| <b>JHEH</b>     | 5' TATGGCCACCTTGTCCCTG 3'          | 5' CCAATCGTATCTGGTTTCGTAG 3'     |
| <b>JHEH-11</b>  | 5' CTCTTTTTATCGCCTTGCCG 3'         | 5' GTTCTTTTACCATCGTTTCACTG 3'    |
| <b>JHEH-12</b>  | 5' CTTTGAAGTCATAGTCCCGAGTC 3'      | 5' CCAATCTCCCCCTTGTATGTAAG 3'    |
| <b>JHEH-13</b>  | 5' TAATAATCATCGCAAACCCGTG 3'       | 5' AATAAAATGTATGTCCAATCCCTGT 3'  |
| <b>JHEH-14</b>  | 5' CCTACAGCCACCCTTAGAAAATG 3'      | 5' AGACCAGCAATGTTCTTAGGTTTTA 3'  |
| <b>JHEH-15</b>  | 5' CTCTGGGCGGATTGTTGTG 3'          | 5' TCCTAAGGCTACCGGTGAATCA 3'     |
