# Supplementary material
Source: PubMed Central journal article supplement (PMC4094618)
Supplement: gmb-73-2-310-ts2.pdf [file gmb-73-2-310-ts2.pdf]

**Table S2 JH-related genes in the other surveyed insects**

| Pathways                                          | Genes                                                  | Gene symbol | <i>D. melanogaster</i> (Diptera) | <i>A. gambiae</i> (Diptera) | <i>A. mellifera</i> (Hymenoptera) | <i>T. castaneum</i> (Coleoptera) | <i>D. plexippus</i> (Lepidoptera) |
|---------------------------------------------------|--------------------------------------------------------|-------------|----------------------------------|-----------------------------|-----------------------------------|----------------------------------|-----------------------------------|
| MVA pathway of JH biosynthesis                    | Acetoacetyl CoA thiolase                               | ACAT        | CG9149                           | AGAP001318                  | GB47436                           | TC_10774                         | DPOGS205286                       |
|                                                   | Hydroxymethylglutaryl-CoA synthase                     | HMGS        | CG4311                           | AGAP005847                  | GB44420                           | TC_09172                         | DPOGS214377                       |
|                                                   | Hydroxymethylglutaryl-CoA reductase                    | HMGR        | CG10367                          | AGAP002288                  | GB51591                           | TC_14159                         | DPOGS213891                       |
|                                                   | Mevalonate kinase                                      | MevK        | CG16804                          | AGAP008947                  | GB47666                           | TC_15408                         | DPOGS207113                       |
|                                                   | Phosphomevalonate kinase                               | MevPK       | CG10268                          | AGAP000338                  | GB49221                           | TC_00390                         | DPOGS202532                       |
|                                                   | Diphosphomevalonate decarboxylase                      | MevPPD      | CG8239                           | AGAP001611                  | GB44718                           | TC_03224                         | DPOGS204657                       |
|                                                   | Isopentenyl-diphosphate delta-isomerase                | IPPI        | CG5919                           | AGAP001704                  | GB44492                           | TC_14514                         | DPOGS202251                       |
|                                                   | Farnesyl diphosphate synthetase                        | FPPS        | CG12389                          | AGAP007104                  | -                                 | TC_09257                         | -                                 |
|                                                   | Farnesyl diphosphate synthetase-like protein 1         | FPPS-11     | -                                | -                           | GB52653                           | -                                | DPOGS207504                       |
|                                                   | Farnesyl diphosphate synthetase-like protein 2         | FPPS-12     | -                                | -                           | GB46095                           | -                                | DPOGS207505                       |
|                                                   | Farnesyl diphosphate synthetase-like protein 3         | FPPS-13     | -                                | -                           | GB46096                           | -                                | -                                 |
|                                                   | Farnesyl diphosphate synthetase-like protein 4         | FPPS-14     | -                                | -                           | GB48899                           | -                                | -                                 |
|                                                   | Farnesyl diphosphate synthetase-like protein 5         | FPPS-15     | -                                | -                           | GB48898                           | -                                | -                                 |
|                                                   | Farnesyl diphosphate synthetase-like protein 6         | FPPS-16     | -                                | -                           | GB48897                           | -                                | -                                 |
| Isoprenoid branch of JH biosynthesis              | Farnesyl phosphatase                                   | FPPase      | CG15739                          | AGAP005972                  | -                                 | -                                | -                                 |
|                                                   | Farnesyl phosphatase-like protein 1                    | FPPase-11   | -                                | -                           | GB42549                           | TC_07787                         | DPOGS213842                       |
|                                                   | Farnesyl phosphatase-like protein 2                    | FPPase-11   | -                                | -                           | GB40767                           | TC_07788                         | DPOGS213511                       |
|                                                   | Farnesyl phosphatase-like protein3                     | FPPase-13   | -                                | -                           | -                                 | TC_07789                         | -                                 |
|                                                   | Farnesol dehydrogenase                                 | FOHSDR      | -                                | -                           | -                                 | -                                | DPOGS212697                       |
|                                                   | Farnesol dehydrogenase-like protein 1                  | FOHSDR-11   | CG1386                           | AGAP005499                  | GB53986                           | TC_15554                         | -                                 |
|                                                   | Farnesol dehydrogenase-like protein 2                  | FOHSDR-12   | CG9360                           | AGAP005500                  | GB54417                           | TC_05026                         | -                                 |
|                                                   | Farnesol dehydrogenase-like protein 3                  | FOHSDR-12   | CG8757                           | AGAP005501                  | -                                 | TC_15100                         | -                                 |
|                                                   | Farnesol dehydrogenase-like protein 4                  | FOHSDR-12   | CG3301                           | AGAP005502                  | -                                 | TC_10240                         | -                                 |
|                                                   | Farnesol dehydrogenase-like protein 5                  | FOHSDR-12   | CG40485                          | AGAP005503                  | -                                 | TC_10257                         | -                                 |
|                                                   | Farnesol dehydrogenase-like protein 6                  | FOHSDR-12   | CG40486                          | AGAP005645                  | -                                 | TC_14887                         | -                                 |
|                                                   | Farnesol dehydrogenase-like protein 7                  | FOHSDR-17   | -                                | -                           | -                                 | TC_15603                         | -                                 |
|                                                   | Aldehyde dehydrogenase                                 | ALDH        | CG11140                          | AGAP005124                  | GB53314                           | -                                | -                                 |
|                                                   | Aldehyde dehydrogenase-like protein 1                  | ALDH-11     | -                                | -                           | -                                 | TC_15554                         | DPOGS215931                       |
|                                                   | Aldehyde dehydrogenase-like protein 2                  | ALDH-12     | -                                | -                           | -                                 | TC_15978                         | DPOGS205397                       |
|                                                   | Aldehyde dehydrogenase-like protein 3                  | ALDH-13     | -                                | -                           | -                                 | TC_15979                         | -                                 |
|                                                   | Aldehyde dehydrogenase-like protein 4                  | ALDH-14     | -                                | -                           | -                                 | TC_05623                         | -                                 |
|                                                   | Aldehyde dehydrogenase-like protein 5                  | ALDH-15     | -                                | -                           | -                                 | TC_05624                         | -                                 |
|                                                   | Aldehyde dehydrogenase-like protein 6                  | ALDH-16     | -                                | -                           | -                                 | TC_05625                         | -                                 |
|                                                   | Juvenile hormone acid methyltransferase                | JHAMT       | CG17330                          | AGAP005256                  | GB44043                           | TC_08471                         | DPOGS214058                       |
|                                                   | Juvenile hormone acid methyltransferase-like protein 1 | JHAMT-11    | -                                | -                           | -                                 | TC_08469                         | -                                 |
|                                                   | Juvenile hormone acid methyltransferase-like protein 2 | JHAMT-12    | -                                | -                           | -                                 | TC_08470                         | -                                 |
|                                                   | Farnesoic acid O-methyltransferase                     | FAMeT       | CG10527                          | AGAP009604                  | -                                 | TC_03485                         | -                                 |
|                                                   | Farnesoic acid O-methyltransferase-like protein 1      | FAMeT-11    | -                                | -                           | GB44422                           | -                                | DPOGS201446                       |
|                                                   | Farnesoic acid O-methyltransferase-like protein 2      | FAMeT-12    | -                                | -                           | GB51413                           | -                                | DPOGS208204                       |
|                                                   | Farnesoic acid O-methyltransferase-like protein 3      | FAMeT-13    | -                                | -                           | -                                 | -                                | DPOGS211579                       |
|                                                   | Farnesoic acid O-methyltransferase-like protein 4      | FAMeT-14    | -                                | -                           | -                                 | -                                | DPOGS210708                       |
| Farnesoic acid O-methyltransferase-like protein 5 | FAMeT-15                                               | -           | -                                | -                           | -                                 | DPOGS210709                      |                                   |
| Cytochrome P450 15A1                              | Cyp15A1                                                | -           | -                                | GB48105                     | TC_02551                          | -                                |                                   |
| Cytochrome P450 15C1                              | Cyp15C1                                                | -           | -                                | -                           | -                                 | DPOGS211658                      |                                   |
| Neuropeptide regulation of JH biosynthesis        | Allatotropin                                           | AT          | -                                | AGAP012130                  | -                                 | TC_06446                         | DPOGS213720                       |
|                                                   | Allatostatin                                           | AS          | CG13633                          | AGAP003712                  | GB47929                           | TC_05428                         | DPOGS211549                       |
|                                                   | Allatotropin receptor                                  | ATR         | CG5811                           | AGAP004783                  | GB44046                           | TC_09749                         | DPOGS209869                       |
|                                                   | Allatostatin receptor                                  | ASR         | CG2872                           | AGAP003658                  | GB43574                           | TC_12842                         | DPOGS213889                       |
| JH metabolism                                     | Juvenile hormone esterase                              | JHE         | CG8425                           | -                           | GB53755                           | TC_09696                         | DPOGS212826                       |
|                                                   | Juvenile hormone esterase-like 1                       | JHE-11      | CG8424                           | AGAP005835                  | GB52052                           | -                                | -                                 |
|                                                   | Juvenile hormone esterase-like 2                       | JHE-12      | -                                | AGAP005836                  | -                                 | -                                | -                                 |
|                                                   | Juvenile hormone epoxide hydrolase                     | JHEH        | CG15101                          | AGAP008684                  | GB42829                           | -                                | -                                 |
|                                                   | Juvenile hormone epoxide hydrolase-like protein 1      | JHEH-11     | CG15102                          | AGAP008685                  | -                                 | TC_03437                         | DPOGS202360                       |
|                                                   | Juvenile hormone epoxide hydrolase-like protein 2      | JHEH-12     | CG15106                          | AGAP008686                  | -                                 | TC_03438                         | DPOGS209151                       |
|                                                   | Juvenile hormone epoxide hydrolase-like protein 3      | JHEH-13     | -                                | -                           | -                                 | TC_02992                         | DPOGS202379                       |

|              |                                                   |          |         |            |         |                   |             |
|--------------|---------------------------------------------------|----------|---------|------------|---------|-------------------|-------------|
|              | Juvenile hormone epoxide hydrolase-like protein 4 | JHEH-14  | -       | -          | -       | TC_03439          | DPOGS211245 |
|              | Juvenile hormone epoxide hydrolase-like protein 5 | JHEH-15  | -       | -          | -       | TC_03436          | DPOGS214825 |
|              | Juvenile hormone epoxide hydrolase-like protein 6 | JHEH-16  | -       | -          | -       | -                 | DPOGS214824 |
|              | Juvenile hormone epoxide hydrolase-like protein 7 | JHEH-17  | -       | -          | -       | -                 | DPOGS214823 |
|              | Juvenile hormone epoxide hydrolase-like protein 8 | JHEH-18  | -       | -          | -       | -                 | DPOGS214834 |
|              | Juvenile hormone diol kinase                      | JHDK     | CG14904 | AGAP004645 | GB49705 | TC_00753          | -           |
|              | Juvenile hormone diol kinase-like protein 1       | JHDK-11  | -       | -          | -       | -                 | DPOGS215250 |
|              | Juvenile hormone diol kinase-like protein 2       | JHDK-12  | -       | -          | -       | -                 | DPOGS215249 |
|              | Juvenile hormone binding protein                  | JHBP     | CG34316 | AGAP004263 | GB42798 | TC_15180          | DPOGS209220 |
| JH signaling | FKBP39                                            | FKBP39   | CG6226  | AGAP007473 | GB48924 | TC_05779          | DPOGS208016 |
|              | Chd64                                             | Chd64    | CG14996 | AGAP001313 | GB51551 | TC_02925          | DPOGS205732 |
|              | Methoprene-tolerant/Methoprene-tolerant 1         | Met/Met1 | CG1705  | AGAP006022 | GB44365 | TC_03908          | DPOGS201662 |
|              | Germ cell expressed/Methoprene-tolerant 2         | Gce/Met2 | CG42739 | -          | -       | -                 | DPOGS207197 |
|              | Ecdysone receptor                                 | EcR      | CG1765  | AGAP012211 | GB48059 | TC_12112/TC_12113 | DPOGS208114 |
|              | Ultraspiracle                                     | USP      | CG4380  | AGAP002095 | GB42692 | TC_14027/TC_14028 | DPOGS214137 |
|              | Kruppel homolog 1                                 | Kr-h1    | CG18783 | AGAP009662 | GB45427 | TC_12990          | DPOGS211127 |

Note: - represents no identification.
